# Supplementary material for: DENT-seq for genome-wide strand-specific identification of DNA single-strand break sites with single-nucleotide resolution
Source: HighWire-hosted journal article supplement (doi:10.1101/gr.265223.120), 2020-12-21
Supplement: Supplemental_Fig_S2.pdf [file Supplemental_Fig_S2.pdf]

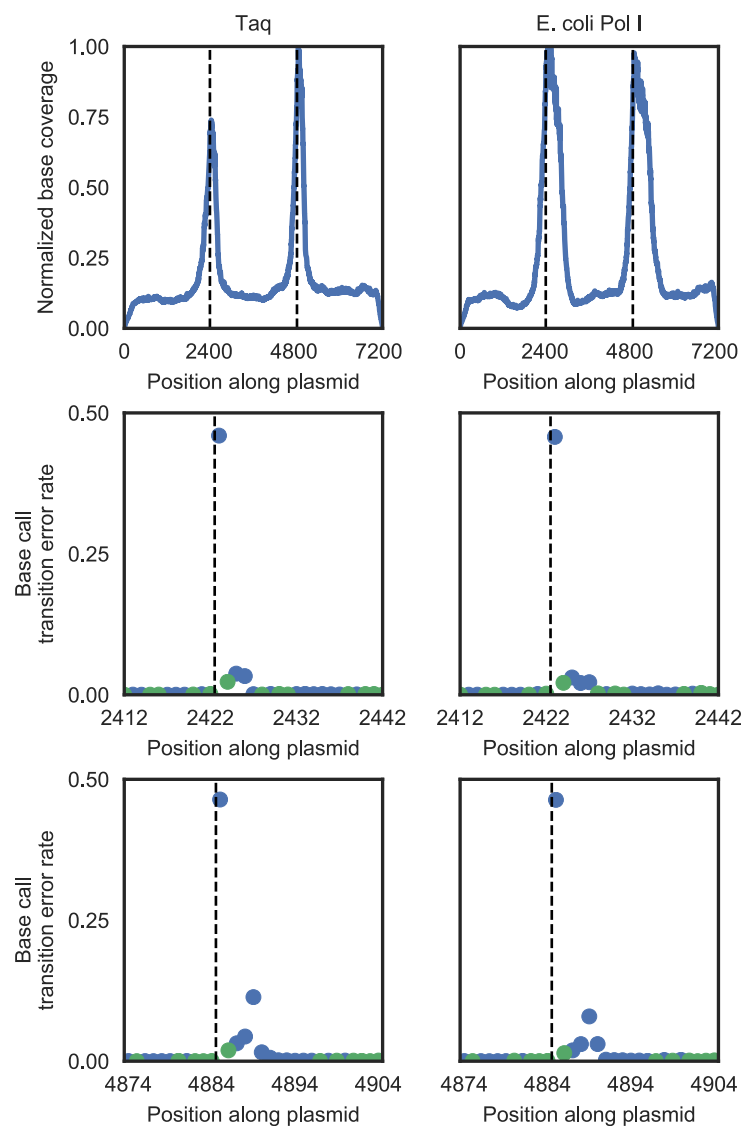

**Figure S2: Different DNA polymerases can be used during the second nick translation.** *E. coli* DNA polymerase I (New England Biolabs) can be used in place of *Taq* DNA polymerase during nick translation with dNTPs and biotin-dUTP. Sequencing peaks are wider with Pol I when nearly identical protocols are used (the only difference being Pol I incubates at 37 °C), however if this is undesirable a shorter incubation time will result in more narrow peaks. Use of Pol I could potentially lead to lower background noise since, unlike *Taq*, it has 3'→5' exonuclease 'proofreading' activity that results in a lower observed base mis-incorporation rate.
