# Supplementary material for: DENT-seq for genome-wide strand-specific identification of DNA single-strand break sites with single-nucleotide resolution
Source: HighWire-hosted journal article supplement (doi:10.1101/gr.265223.120), 2020-12-21
Supplement: Supplemental_Fig_S3.pdf [file Supplemental_Fig_S3.pdf]

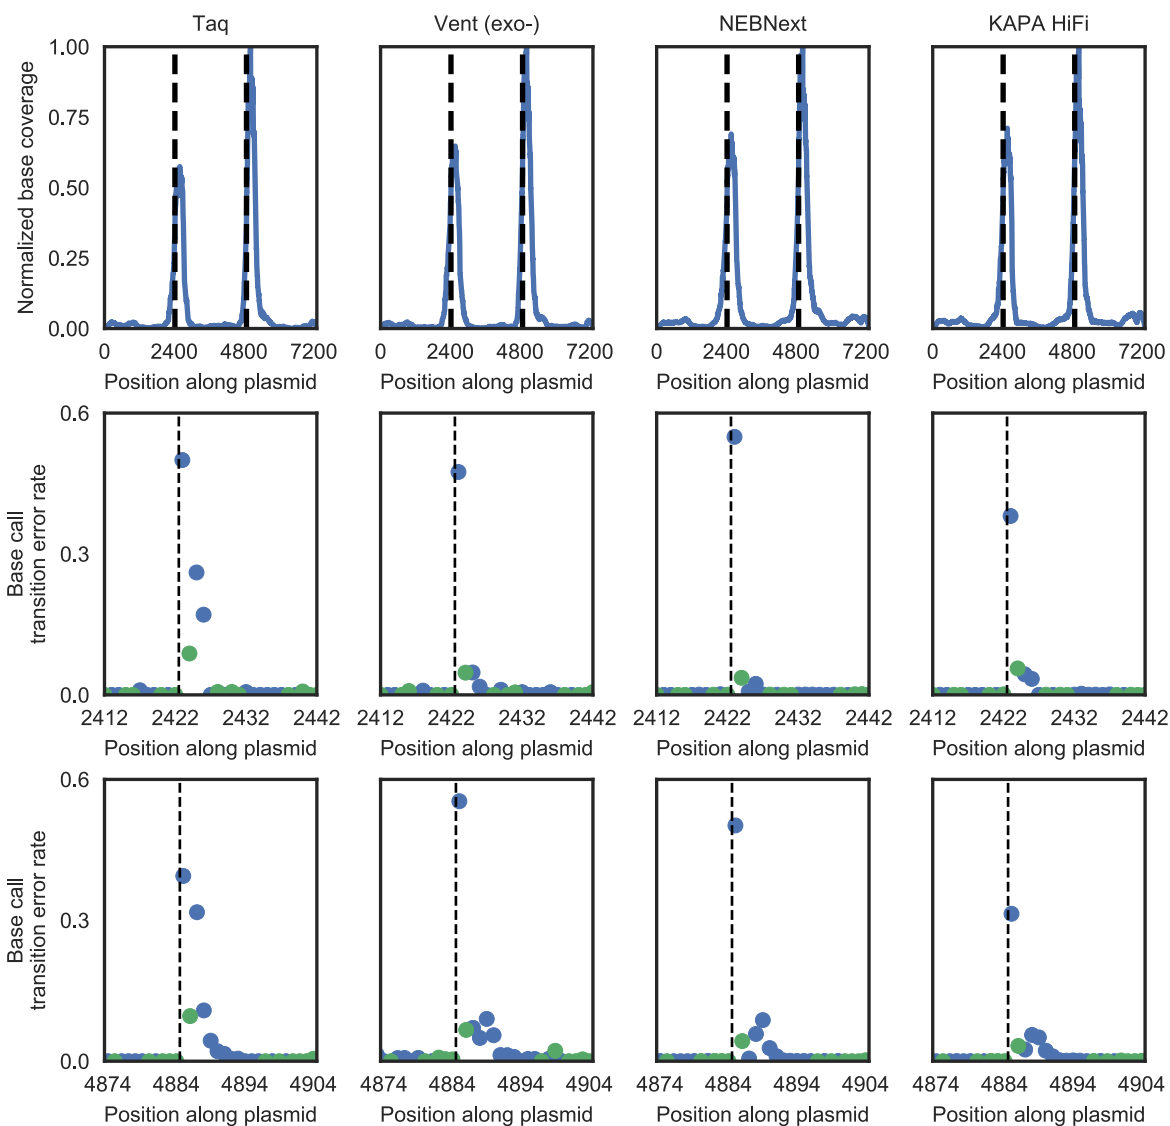

**Figure S3: Different DNA polymerases can be used during PCR.** In addition to *Taq* DNA polymerase and KAPA HiFi, Vent (exo-) DNA polymerase (New England Biolabs) and NEBNext (New England Biolabs) can be used during PCR. Each enzyme results in slightly different signal intensities from the incorporated degenerate bases. However, while *Taq* has higher signal than KAPA HiFi, for example, it also has a higher level of background noise due to its higher base mis-incorporation rate.
