# Supplementary material for: DENT-seq for genome-wide strand-specific identification of DNA single-strand break sites with single-nucleotide resolution
Source: HighWire-hosted journal article supplement (doi:10.1101/gr.265223.120), 2020-12-21
Supplement: Supplemental_Fig_S5.pdf [file Supplemental_Fig_S5.pdf]

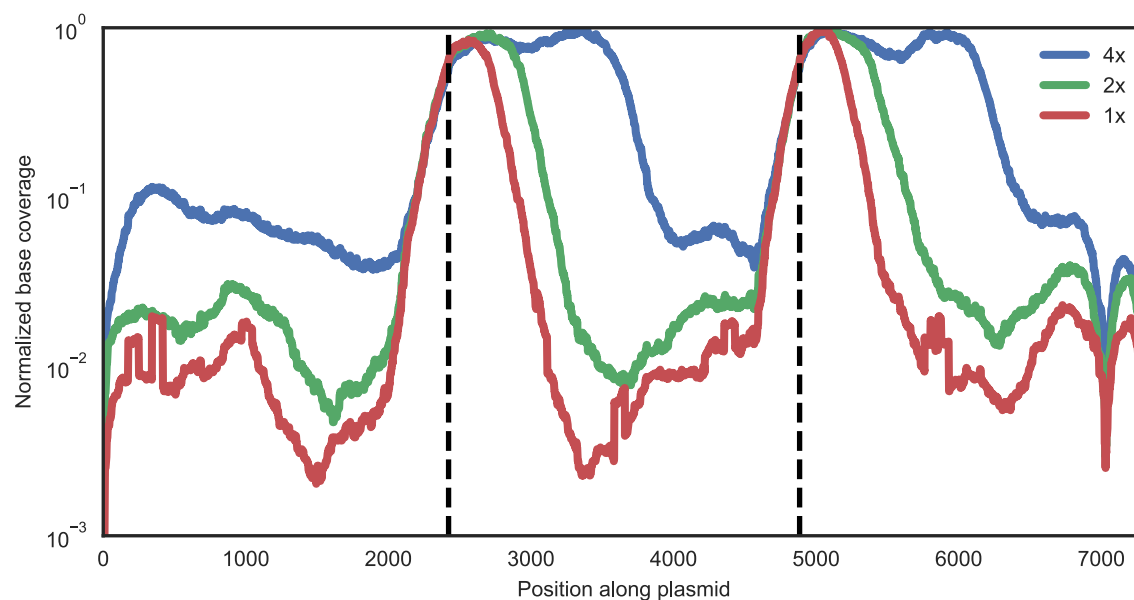

**Figure S5: Sequencing coverage peaks widen with increasing dNTP and biotinylated dUTP concentrations used during nick translation.** The optimal concentration of dNTPs during the second nick translation was determined to be 40 nM with a 1:5 ratio of biotinylated dUTP to dTTP (defined as 1x). At higher concentrations, the peaks in sequencing coverage around the nicks become wider and there is additional background at locations far from nicks.
