# Supplementary material for: DENT-seq for genome-wide strand-specific identification of DNA single-strand break sites with single-nucleotide resolution
Source: HighWire-hosted journal article supplement (doi:10.1101/gr.265223.120), 2020-12-21
Supplement: Supplemental_Table_S1.xlsx [file Supplemental_Table_S1.xlsx]

## Sheet: Sheet1
Method	Publication	Detection strategy	Genomic resolution	Number of sequencing libraries per sample	Most complex DNA tested	Lowest SSB penetrance detected	Types of breaks
Alkaline comet assay	Collins (2004). Mol Biotechnol	Single cell gel electrophoresis	None	0	n.a.	n.a.	SSBs and DSBs
SSB-seq	Baranello, et al. (2014). Int J Mol Sci	Nick translation	Low	1	Human genome	n.a.	SSB-specific
SSiNGLe	Cao, et al. (2019). Nat commun	poly(A) tailing	High (single nucleotide, except at sites adjacent to A residues)	1	Human genome	n.a.	SSBs and DSBs
GLOE-seq	Sriramachandran, et al. (2020). Mol Cell	Fragment ligation	Single nucleotide	1	Human genome	1/1,000	SSBs and DSBs
Nick-seq	Cao, et al. (2020). Nucleic acids res	Nick translation and poly(T) tailing	Single nucleotide	2	E. Coli genome	n.a.	SSB-specific
DENT-seq	This work	Nick translation	Single nucleotide	1	Human genome	1/1,000	SSB-specific
Table S1: Comparison of the current SSB detection methods. SSB-seq identifies SSBs by nick translation with digoxigenin-modified nucleotides followed by anti-digoxigenin immunoprecipitation, but does not achieve single nucleotide resolution. SSiNGLe detects SSBs via poly(A) tailing of 3' -OH DNA ends. This has the potential to achieve single nucleotide resolution at some loci, but the precise loc…
