# Supplementary material for: DENT-seq for genome-wide strand-specific identification of DNA single-strand break sites with single-nucleotide resolution
Source: HighWire-hosted journal article supplement (doi:10.1101/gr.265223.120), 2020-12-21
Supplement: Supplemental_Table_S2.xlsx [file Supplemental_Table_S2.xlsx]

## Sheet: Sheet1
Plasmid DNA, no nicking treatment (data shown in Fig. 3A, top), bootstrapping to estimate false-positive rate
Maximum transition mutation signal	Number of bootstraps performed	Maximum signal in bootstraps	Number of false-positives identified in bootstraps	Number of base pairs in MACS2 peaks in a typical plasmid experiment	Estimated false-positive rate per nucleotide in MACS2 peaks
0.027	10000	0.031	0	1567	6.38162e-08
Estimated number of false-positive across experiments on different classes of DNA
DNA class	Reference length in bp	Number of bp contained in MACS2 peaks	Fraction of DNA contained in MACS2 peaks	Estimated number of false-positives per experiment	Number of experiments performed that will result in 1 false-positive
Plasmid	7305	1567	0.214511	0.0001	10000
E. coli genome	4622358	992737	0.214769	0.0633527	15.7846
Human genome	3148637547	4039938	0.00128307	0.257814	3.87877
Bootstrapping plasmid DNA with different nick penetrances (data shown in Fig. S7) to estimate false-negative rate
Nick pentrance	Nick locus	Transition mutation signal	Number of bootstraps performed	Minimum signal in bootstraps	Fraction of bootstraps with signal above 0.05	Estimated false-negative rate
1	2422	0.329	10000	0.316	1	0.0001
	4884	0.295		0.286
0.1	2422	0.323		0.312	1	0.0001
	4884	0.294		0.277
0.01	2422	0.256		0.249	1	0.0001
	4884	0.238		0.222
0.0001	2422	0.0647		0.0587	0.8782	0.1218
	4884	0.06		0.046
Bootstrapping E. coli genomic DNA (data shown in Fig. 5) to estimate false negative rate
Nick locus	Transition mutation signal	Number of bootstraps performed	Minimum signal in bootstraps	Fraction of bootstraps with signal above 0.05	Estimated false-negative rate
231867	0.526	1000	0.501	1	0.001
1142933	0.903		0.83	1	0.001
2646965	0.28		0.244	1	0.001
3349191	0.393		0.373	1	0.001
3349437	0.309		0.289	1	0.001
3906462	0.423		0.395	1	0.001
4016944	0.548		0.523	1	0.001
4149378	0.282		0.261	1	0.001
4190675	0.55		0.527	1	0.001
Supplemental Table S2: Bootstrapping to estimate false-positive and false-negative rates of DENT-seq. Determining false-positive and false-negative rates for our method is challenging to perform due to the lack of a rigorous ground-truth definition for true-positive nicks in samples we are able to generate with nicking enzymes. That is, false-positives cannot be definitively differentiated from p…
