# Supplementary material for: DENT-seq for genome-wide strand-specific identification of DNA single-strand break sites with single-nucleotide resolution
Source: HighWire-hosted journal article supplement (doi:10.1101/gr.265223.120), 2020-12-21
Supplement: Supplemental_Table_S3.xlsx [file Supplemental_Table_S3.xlsx]

## Sheet: Sheet1
Nicking endonuclease Nb.BSMI recognition sequence: GAATGCN
Name	Locus	Strand	Sequence	Transition rate	-log(MACS2 q score)
On target 1	2422	+	GAATGCG	0.464355	331.68753
On target 2	4884	+	GAATGCC	0.461566	833.05078
Off target 12	7095	+	GAACGCG	0.135637	n.a.
Off target 11	7011	+	GAATGAC	0.0988043	n.a.
Off target 9	6726	+	GGATGCT	0.0799496	n.a.
Off target 10	6836	-	GGATGCA	0.0488095	n.a.
Off target 7	5605	-	GAACGCC	0.0440055	n.a.
Off target 4	889	+	AAATGCC	0.0430787	n.a.
Off target 1	105	-	GAATGTG	0.042616	n.a.
Off target 3	625	+	GACTGCC	0.0279306	n.a.
Off target 8	6201	-	GAGTGCC	0.0255537	n.a.
Off target 2	354	-	GAATGTC	0.0228463	n.a.
Off target 5	1138	-	GAATGAC	0.017179	n.a.
Off target 6	3835	+	AAATGCA	0.0163297	n.a.
Table S3: Off-target nicks detected after treatment of a plasmid with nicking endonuclease Nb.BsmI. The on-target sites of Nb.BsmI treatment have enrichment identifiable by MACS2. The off-target sites do not have such identifiable enrichment but nicks can still be identified by DENT-seq's mutational signal.
