# Supplementary material for: DENT-seq for genome-wide strand-specific identification of DNA single-strand break sites with single-nucleotide resolution
Source: HighWire-hosted journal article supplement (doi:10.1101/gr.265223.120), 2020-12-21
Supplement: Supplemental_Table_S4.xlsx [file Supplemental_Table_S4.xlsx]

## Sheet: Sheet1
guide RNA sequence: GGGGCCACTAGGGACAGGAT
Name	Locus	Strand	Sequence	PAM	-log(MACS2 q score)	Transition rate
On target	1142	-	GGGGCCACTAGGGACAGGAT	TGG	90.17108	0.6097059179474767
Off target	4010	-	AGCTTTACTAGGGACAGGAT	TGG	70.17111	0.4453575799965029
Table S4: Nicks detected after treatment of a plasmid with D10A spCas9 nickase. The on-target and off-target sites of this Cas9 nickase treatment both result in highly enriched sequence peaks and a readily-identifiable mutational signal after performing DENT-seq. The off-target site has lower enrichment, likely due to lower penetrance of nicks.
