# Supplementary material for: DENT-seq for genome-wide strand-specific identification of DNA single-strand break sites with single-nucleotide resolution
Source: HighWire-hosted journal article supplement (doi:10.1101/gr.265223.120), 2020-12-21
Supplement: Supplemental_Table_S5.xlsx [file Supplemental_Table_S5.xlsx]

## Sheet: Sheet1
guide RNA sequence: GGGGCCACTAGGGACAGGAT
Name	Chromosome	Locus	Strand	Sequence	PAM	-log(MACS2 q score)	Transition rate	Identified by Tan et al. (2015)	Identified by Wang et al. (2014)	Identified without a priori knowledge
Off 1	chr1	2836456	+	GGGACCTCCAGGGACAGGAC	GGG	1.50985	0.35	n.a.	n.a.	Yes
Off 2	chr1	4080070	+	TGGGGCCACAGGGACAGGAC	AGG	0.27097	0.4	n.a.	n.a.	No
Off 3	chr1	20020462	+	GCAATTAACAGGAACAGGAT	TGG	n.a.	0.2222222222222222	n.a.	n.a.	No
Off 4	chr1	95200632	-	CAGGGGCACCGGGACAGGAT	GGG	n.a.	0.4	n.a.	n.a.	No
Off 5	chr1	172529245	-	TAGGGGCCCAGAGACAGGAT	GAG	0.07919	0.38461538461538464	n.a.	n.a.	No
Off 6	chr1	181190082	+	GGAGCCATGAGGGACAGGAG	GGG	0.27097	0.5	n.a.	n.a.	No
Off 7	chr1	232797742	+	GTGACCACTCAGGACAGGTT	GGG	0.27097	0.2558139534883721	n.a.	n.a.	No
Off 8	chr1	239493007	+	GGAGCCCCTAGAAACAGAAT	GAG	n.a.	0.3	n.a.	n.a.	No
Off 9	chr2	138300885	-	TCAGAATCTAAGGACAGGAT	GGG	n.a.	0.6	n.a.	n.a.	No
Off 10	chr3	46313787	+	TGGGGTCCACAGGGCAGGAT	TGG	0.07919	0.3333333333333333	n.a.	n.a.	No
Off 11	chr3	148674158	+	CAGGGCTTTAGGGACAGGAT	GAG	n.a.	0.14285714285714285	n.a.	n.a.	No
Off 12	chr4	92258747	+	AGAGGAACTAGGAACAGGAT	GAG	n.a.	0.10256410256410256	n.a.	n.a.	No
Off 13	chr4	160183199	+	TGGGGAACCAGACACAGGAT	GGG	n.a.	0.6363636363636364	n.a.	n.a.	No
Off 14	chr5	16825712	+	CTGGGCACTGGGGACAAGAT	GGG	n.a.	0.6666666666666666	n.a.	n.a.	No
Off 15	chr5	92665932	+	TGGTCCATTGTGGAACGGAA	CGG	n.a.	0.4782608695652174	n.a.	n.a.	No
Off 16	chr6	36765479	-	GGGACCATCAGGGACAGGAT	GGG	1.73856	0.42857142857142855	Yes	n.a.	Yes
Off 17	chr7	83071634	+	CTTGGGGCTAAGGAAAGGAT	CGG	0.18206	0.10256410256410256	n.a.	n.a.	No
Off 18	chr8	29415610	+	CCTTTTTCTAGAGACAGGAT	GGG	n.a.	0.19047619047619047	n.a.	n.a.	No
Off 19	chr8	101764672	-	GGTCCCTTTTTGGAGAGGAG	AGG	n.a.	0.16666666666666666	n.a.	n.a.	No
Off 20	chr9	131477544	-	AGGGTGGTATGGGACGGGAT	TGG	n.a.	0.2	n.a.	n.a.	No
Off 21	chr9	132218834	-	GACTTCCACAGGGACAGTAT	CAG	n.a.	0.25	n.a.	n.a.	No
Off 22	chr9	137166266	-	TGGCACTTCAGGGACAGGGT	TGG	n.a.	0.17647058823529413	n.a.	n.a.	No
Off 23	chr10	5102863	+	GCGGGCACATGGCACAGGAT	TGG	n.a.	0.3	n.a.	n.a.	No
Off 24	chr10	87923068	+	ATGGGCCTCAAGGACAGGAT	GGG	0.27097	0.125	n.a.	n.a.	No
Off 25	chr10	102879405	+	AAGGCCATAGGGGACAGGAT	GGG	n.a.	0.14285714285714285	No	n.a.	No
Off 26	chr10	125317721	-	TGATGCACTAAGGACAGGAT	TAG	n.a.	0.16666666666666666	n.a.	n.a.	No
Off 27	chr10	126028025	+	TGGGCCCTCAGGGACAGGAA	GGG	n.a.	0.7777777777777778	n.a.	n.a.	No
Off 28	chr10	128220971	+	CTGGGACCAAGAAACAGGAT	AGG	n.a.	0.45454545454545453	n.a.	n.a.	No
Off 29	chr10	128585314	+	CCAAAGGCTAAGGACAGGAT	GGG	n.a.	0.2	n.a.	n.a.	No
Off 30	chr11	61111252	-	CAGGCCACCAGGGTCAGGAT	GGG	3.22315	0.2727272727272727	No	n.a.	Yes
Off 31	chr11	65297768	+	GCAGCCACTAGGGACAGCAG	AGG	n.a.	0.5333333333333333	n.a.	n.a.	No
Off 32	chr11	117725106	-	TGGGCCACCAGGGACA--AT	GGG	0.20855	0.1935483870967742	n.a.	n.a.	No
Off 33	chr11	119300248	+	TGGTGACACAGGGACAGGAT	AAG	n.a.	0.3333333333333333	n.a.	n.a.	No
Off 34	chr11	132300800	-	CTGCACACTAAGGACAGGAT	GGG	0.07919	0.2857142857142857	n.a.	n.a.	No
Off 35	chr12	108581681	+	TGGGCCACTATGGACAGGAA	TGG	0.62294	0.10526315789473684	No	No	Yes
Off 36	chr13	100201104	+	AATGGGCCTAGGCACAGGAA	GGG	n.a.	0.25	n.a.	n.a.	No
Off 37	chr14	28907758	-	TGGGTCACTA--GACAGGAT	AGG	0.37875	0.5454545454545454	n.a.	n.a.	No
Off 38	chr14	46184782	+	AGGGACCATAGGGACAGATA	GGG	n.a.	0.3684210526315789	n.a.	n.a.	No
Off 39	chr15	25467900	+	GGGACCACTGGGCACAGGAT	CGG	n.a.	0.5	No	n.a.	No
Off 40	chr15	35634046	-	CCAGTCAGTAGGAACAGGAT	CAG	n.a.	0.24	n.a.	n.a.	No
Off 41	chr15	68640449	+	GGAGCCTCCCAGGACTGCAA	GGG	n.a.	0.2	n.a.	n.a.	No
Off 42	chr17	18138609	+	CAAGGCACTGGAGACAGGCT	GGG	n.a.	0.4444444444444444	n.a.	n.a.	No
Off 43	chr17	29171909	+	ATCAAAACTAGGGACAGGAT	CAG	n.a.	0.9	n.a.	n.a.	No
Off 44	chr18	22636414	+	GGGCGCACCGGCGGAACGAT	GGG	n.a.	0.8214285714285714	n.a.	n.a.	No
Off 45	chr18	31395974	+	TGAGGCCATAGGGGCAGGAT	GGG	1.47317	0.14285714285714285	n.a.	n.a.	No
Off 46	chr18	39396866	-	CATCCATCTAGGGACAGGAT	AAG	n.a.	0.24324324324324326	n.a.	n.a.	No
Off 47	chr19	52270321	+	GGTGAGGGGAGGGACAGGAT	CAG	n.a.	0.42857142857142855	n.a.	n.a.	No
AAVS1	chr19	55627122	+	GGGGCCACTAGGGACAGGAT	TGG	3.68486	0.45454545454545453	Yes	Yes	Yes
Off 48	chr20	19580473	+	GTAGATGCCAGGAACAGGAT	GGG	n.a.	0.6666666666666666	n.a.	n.a.	No
Off 49	chr20	31034835	+	GGGGCCAGTAGGGGCAGGAC	AGG	1.37413	0.24324324324324326	No	No	Yes
Off 50	chr21	42892947	+	GGGGCCCCTGGGGACAGAAT	GGG	n.a.	0.16666666666666666	Yes	Yes	No
Off 51	chr22	20781846	-	TGGGCCACTGGGGAAGGATG	AGG	n.a.	0.6875	n.a.	n.a.	No
Off 52	chr22	48542338	-	CTCACCCCTAAGGACAGGAT	GAG	n.a.	0.25	n.a.	n.a.	No
Off 53	chrX	31811312	-	GGTTTTTATAGGCACAGGAT	GGG	n.a.	0.6666666666666666	n.a.	n.a.	No
Table S5: Detected off-target activity of D10A sCas9 nickase on human genomic DNA. Of note, data presented here is the result of mapping sequence reads to human genome reference build hg19. Mapping to this older version of the reference was performed to compare off-targets identified here for D10A spCas9 nickase to off-targets identified by Tan et al. (2015) and Wang et al. (2014) for wild-type s…
