# Supplementary material for: DENT-seq for genome-wide strand-specific identification of DNA single-strand break sites with single-nucleotide resolution
Source: HighWire-hosted journal article supplement (doi:10.1101/gr.265223.120), 2020-12-21
Supplement: Supplemental_Table_S6.xlsx [file Supplemental_Table_S6.xlsx]

## Sheet: Sheet1
Sample	Figure(s)	Number of mapped read pairs	Mapping rate	Number of mapped reads after quality filter (only applies to data on human genome)	Read length	Average read depth	Fraction of reads that are PCR duplicates
Non-nicked plasmid	3B (top)	1,278,339	88.29%	n.a.	75 x 75	26,249	80.5%
Plasmid nicked by Nb.BsmI	3B (bottom), 3C, S5 (red)	645,835	92.74%	n.a.	75 x 75	13,261	92.9%
Plasmid nicked by Nb.BsmI, off-targets detected	4B, S8A (left)	774,573	93.90%	n.a.	38 x 37	7,952	74.4%
Plasmid nicked by Cas9 nickase	4D	78,223	92.51%	n.a.	38 x 37	714.6	96.5%
E. coli genome nicked by Cas9 nickase	5, S6, S9	3,537,029	97.69%	n.a.	38 x 37	57.4	99.6%
Human genome nicked by Cas9 nickase	6	78,916,868	93.29%	68,101,060	75 x 75	3.29	90.1%
Plasmid nicked by Nb.BsmI, extension by Taq	S2 (left)	805692	0.9211	n.a.	38 x 37	8,272	82.4%
Plasmid nicked by Nb.BsmI, extension by E. coli Pol I	S2 (right)	756198	0.7867	n.a.	38 x 37	7,764	87.4%
Plasmid nicked by Nb.BsmI, PCR by Taq	S3 (leftmost)	3056	0.8503	n.a.	38 x 37	31.3	18.1%
Plasmid nicked by Nb.BsmI, PCR by Vent(exo-)	S3 (left-middle)	2976	0.8862	n.a.	38 x 37	30.6	15.83%
Plasmid nicked by Nb.BsmI, PCR by NEBNext HiFi	S3 (right-middle)	70580	0.9319	n.a.	38 x 37	724.6	60.38%
Plasmid nicked by Nb.BsmI, PCR by KAPA HiFi	S3 (rightmost)	127266	0.9511	n.a.	38 x 37	1,307	80.18%
Plasmid nicked by Nb.BsmI, pulldown on DTB-dCTP	S4 (top, blue)	339325	0.4793	n.a.	75 x 75	6,968	99.04%
Plasmid nicked by Nb.BsmI, pulldown and elution on DTB-dCTP	S4 (top, green)	320583	0.607	n.a.	75 x 75	6,583	99.43%
Plasmid nicked by Nb.BsmI, pulldown on B-dUTP	S4 (top, red)	402982	0.7047	n.a.	75 x 75	8,275	92.21%
Plasmid nicked by Nb.BsmI, pulldown on DTB-dATP	S4 (bottom, blue)	1666102	0.8576	n.a.	38 x 37	17,106	97.66%
Plasmid nicked by Nb.BsmI, pulldown and elution on DTB-dATP	S4 (bottom, green)	1148119	0.853	n.a.	38 x 37	11,788	96.75%
Plasmid nicked by Nb.BsmI, pulldown on B-dUTP	S4 (bottom, red)	1834920	0.8652	n.a.	38 x 37	18,839	93.34%
Plasmid nicked by Nb.BsmI, 4x dNTPs + biotin-dUTP	S5 (blue)	891681	0.889	n.a.	75 x 75	18,310	85.7%
Plasmid nicked by Nb.BsmI, 2x dNTPs + biotin-dUTP	S5 (green)	138352	0.9264	n.a.	75 x 75	2,841	75.9%
Plasmid nicked by Nb.BsmI, off-targets detected, no pulldown	S8A (right)	1121481	0.9459	n.a.	38 x 37	11514	0.625
Table S6: Mapping rate and other sequencing metrics of DENT-seq data sets. Of note, a number of samples here (especially plasmids) are sequenced to very high read depths. Such deep sequencing is not required for performing DENT-seq.
