# Supplementary material for: DENT-seq for genome-wide strand-specific identification of DNA single-strand break sites with single-nucleotide resolution
Source: HighWire-hosted journal article supplement (doi:10.1101/gr.265223.120), 2020-12-21
Supplement: Supplemental_Table_S7.xlsx [file Supplemental_Table_S7.xlsx]

## Sheet: Sheet1
guide RNA sequence: GGGGCCACTAGGGACAGGAT
Name	Chromosome	hg38 locus	Strand	Sequence	PAM	Matches an hg19 off-target sequence?	hg19 locus	hg38 locus matches hg19 locus after NCBI Genome Remapping Service?	hg38 -log(MACS2 q score)	hg19 -log(MACS2 q score)	Transition rate	Identified without a priori knowledge
Off 1	chr1	2919891	+	GGGACCTCCAGGGACAGGAC	GGG	Yes	2836456	Yes	2.27038	1.50985	0.35	Yes
Off 2	chr1	4020010	+	TGGGGCCACAGGGACAGGAC	AGG	Yes	4080070	Yes	0.58659	0.27097	0.4	No
Off 3	chr1	19693969	+	GCAATTAACAGGAACAGGAT	TGG	Yes	20020462	Yes	n.a.	n.a.	0.2222222222222222	No
Off 4	chr1	94735076	-	CAGGGGCACCGGGACAGGAT	GGG	Yes	95200632	Yes	n.a.	n.a.	0.4	No
Off 5	chr1	172560105	-	TAGGGGCCCAGAGACAGGAT	GAG	Yes	172529245	Yes	0.15159	0.07919	0.38461538461538464	No
Off 6	chr1	181220946	+	GGAGCCATGAGGGACAGGAG	GGG	Yes	181190082	Yes	0.58783	0.27097	0.5	No
Off 7	chr1	232661996	+	GTGACCACTCAGGACAGGTT	GGG	Yes	232797742	Yes	0.58783	0.27097	0.2558139534883721	No
Off 8	chr1	239329707	+	GGAGCCCCTAGAAACAGAAT	GAG	Yes	239493007	Yes	n.a.	n.a.	0.3	No
Off 9	chr2	137543315	-	TCAGAATCTAAGGACAGGAT	GGG	Yes	138300885	Yes	n.a.	n.a.	0.6	No
Off 10	chr3	46272296	+	TGGGGTCCACAGGGCAGGAT	TGG	Yes	46313787	Yes	n.a.	0.07919	0.3333333333333333	No
Off 11	chr3	148956371	+	CAGGGCTTTAGGGACAGGAT	GAG	Yes	148674158	Yes	n.a.	n.a.	0.14285714285714285	No
Off 12	chr4	91337596	+	AGAGGAACTAGGAACAGGAT	GAG	Yes	92258747	Yes	n.a.	n.a.	0.10256410256410256	No
Off 13	chr4	159262047	+	TGGGGAACCAGACACAGGAT	GGG	Yes	160183199	Yes	n.a.	n.a.	0.6363636363636364	No
Off 14	chr5	16825603	+	CTGGGCACTGGGGACAAGAT	GGG	Yes	16825712	Yes	n.a.	n.a.	0.6666666666666666	No
Off 15	chr5	93330226	+	TGGTCCATTGTGGAACGGAA	CGG	Yes	92665932	Yes	n.a.	n.a.	0.4782608695652174	No
Off 16	chr6	36797702	-	GGGACCATCAGGGACAGGAT	GGG	Yes	36765479	Yes	2.56866	1.73856	0.42857142857142855	Yes
Off 17	chr7	83442318	+	CTTGGGGCTAAGGAAAGGAT	CGG	Yes	83071634	Yes	0.2314	0.18206	0.10256410256410256	No
Off 18	chr8	29558093	+	CCTTTTTCTAGAGACAGGAT	GGG	Yes	29415610	Yes	n.a.	n.a.	0.19047619047619047	No
Off 19	chr8	100752444	-	GGTCCCTTTTTGGAGAGGAG	AGG	Yes	101764672	Yes	n.a.	n.a.	0.16666666666666666	No
Off 20	chr9	128715265	-	AGGGTGGTATGGGACGGGAT	TGG	Yes	131477544	Yes	n.a.	n.a.	0.2	No
Off 21	chr9	129456555	-	GACTTCCACAGGGACAGTAT	CAG	Yes	132218834	Yes	n.a.	n.a.	0.25	No
Off 22	chr9	134274420	-	TGGCACTTCAGGGACAGGGT	TGG	Yes	137166266	Yes	n.a.	n.a.	0.17647058823529413	No
Off 23	chr10	5060671	+	GCGGGCACATGGCACAGGAT	TGG	Yes	5102863	Yes	n.a.	n.a.	0.3	No
Off 24	chr10	86163311	+	ATGGGCCTCAAGGACAGGAT	GGG	Yes	87923068	Yes	0.56491	0.27097	0.125	No
Off 25	chr10	101119648	+	AAGGCCATAGGGGACAGGAT	GGG	Yes	102879405	Yes	n.a.	n.a.	0.14285714285714285	No
Off 26	chr10	123558205	-	TGATGCACTAAGGACAGGAT	TAG	Yes	125317721	Yes	n.a.	n.a.	0.16666666666666666	No
Off 27	chr10	124339456	+	TGGGCCCTCAGGGACAGGAA	GGG	Yes	126028025	Yes	n.a.	n.a.	0.7777777777777778	No
Off 28	chr10	126532402	+	CTGGGACCAAGAAACAGGAT	AGG	Yes	128220971	Yes	n.a.	n.a.	0.45454545454545453	No
Off 29	chr10	126896745	+	CCAAAGGCTAAGGACAGGAT	GGG	Yes	128585314	Yes	n.a.	n.a.	0.2	No
Off 30	chr11	61343780	-	CAGGCCACCAGGGTCAGGAT	GGG	Yes	61111252	Yes	4.07782	3.22315	0.2727272727272727	Yes
Off 31	chr11	65530297	+	GCAGCCACTAGGGACAGCAG	AGG	Yes	65297768	Yes	n.a.	n.a.	0.5333333333333333	No
Off 32	chr11	117854391	-	TGGGCCACCAGGGACA--AT	GGG	Yes	117725106	Yes	0.25863	0.20855	0.1935483870967742	No
Off 33	chr11	119429538	+	TGGTGACACAGGGACAGGAT	AAG	Yes	119300248	Yes	n.a.	n.a.	0.3333333333333333	No
Off 34	chr11	132430906	-	CTGCACACTAAGGACAGGAT	GGG	Yes	132300800	Yes	0.15159	0.07919	0.2857142857142857	No
Off 35	chr12	108187904	+	TGGGCCACTATGGACAGGAA	TGG	Yes	108581681	Yes	0.99222	0.62294	0.10526315789473684	Yes
Off 36	chr13	99548850	+	AATGGGCCTAGGCACAGGAA	GGG	Yes	100201104	Yes	n.a.	n.a.	0.25	No
Off 37	chr14	28438552	-	TGGGTCACTA--GACAGGAT	AGG	Yes	28907758	Yes	0.67582	0.37875	0.5454545454545454	No
Off 38	chr14	45715579	+	AGGGACCATAGGGACAGATA	GGG	Yes	46184782	Yes	n.a.	n.a.	0.3684210526315789	No
Off 39	chr15	25222753	+	GGGACCACTGGGCACAGGAT	CGG	Yes	25467900	Yes	n.a.	n.a.	0.5	No
Off 40	chr15	35341845	-	CCAGTCAGTAGGAACAGGAT	CAG	Yes	35634046	Yes	n.a.	n.a.	0.24	No
Off 41	chr15	68348111	+	GGAGCCTCCCAGGACTGCAA	GGG	Yes	68640449	Yes	n.a.	n.a.	0.2	No
Off 42	chr17	18235295	+	CAAGGCACTGGAGACAGGCT	GGG	Yes	18138609	Yes	n.a.	n.a.	0.4444444444444444	No
Off 43	chr17	30844891	+	ATCAAAACTAGGGACAGGAT	CAG	Yes	29171909	Yes	n.a.	n.a.	0.9	No
Off 44	chr18	25056450	+	GGGCGCACCGGCGGAACGAT	GGG	Yes	22636414	Yes	n.a.	n.a.	0.8214285714285714	No
Off 45	chr18	33816010	+	TGAGGCCATAGGGGCAGGAT	GGG	Yes	31395974	Yes	2.22866	1.47317	0.14285714285714285	No
Off 46	chr18	41816901	-	CATCCATCTAGGGACAGGAT	AAG	Yes	39396866	Yes	n.a.	n.a.	0.24324324324324326	No
Off 47	chr19	51767068	+	GGTGAGGGGAGGGACAGGAT	CAG	Yes	52270321	Yes	n.a.	n.a.	0.42857142857142855	No
AAVS1	chr19	55115754	+	GGGGCCACTAGGGACAGGAT	TGG	Yes	55627122	Yes	4.55062	3.68486	0.45454545454545453	Yes
Off 48	chr20	19599829	+	GTAGATGCCAGGAACAGGAT	GGG	Yes	19580473	Yes	n.a.	n.a.	0.6666666666666666	No
Off 49	chr20	32447032	+	GGGGCCAGTAGGGGCAGGAC	AGG	Yes	31034835	Yes	2.10517	1.37413	0.24324324324324326	Yes
Off 50	chr21	41521020	+	GGGGCCCCTGGGGACAGAAT	GGG	Yes	42892947	Yes	n.a.	n.a.	0.16666666666666666	No
Off 51	chr22	20427559	-	TGGGCCACTGGGGAAGGATG	AGG	Yes	20781846	Yes	n.a.	n.a.	0.6875	No
Off 52	chr22	48146521	-	CTCACCCCTAAGGACAGGAT	GAG	Yes	48542338	Yes	n.a.	n.a.	0.25	No
Off 53	chrX	31793195	-	GGTTTTTATAGGCACAGGAT	GGG	Yes	31811312	Yes	n.a.	n.a.	0.6666666666666666	No
Table S7: Comparison of D10A spCas9 nickase off-targets identified by DENT-seq when sequence reads are mapped to hg38 versus hg19. Mapping sequence reads to hg38 rather than hg19 does not change the off-targets that are identified. All off-target DNA sequences identified in hg38 match one of the hg19 off-target sequences and the loci are equivalent to one another according to the NCBI Genome Rema…
